# Supplementary material
Source: publisher figshare collection journal article supplement (https://gsapubs.figshare.com/ndownloader/files/24850541)
Supplement: Supplementary file 1 [file 24850541]

## Sheet: Sheet1
Supplemental Material for Ashworth, A.C., Thackray, G.D., and Gavin, D.G., 2020, Climate of the Last Glacial Maximum on the western Olympic Peninsula
based on insect paleoecology, palynology, and glacial geology, in Waitt, R.B., Thackray, G.D., and Gillespie, A.R., eds., Untangling the Quaternary Period:
A Legacy of Stephen C. Porter: Geological Society of America Special Paper 548, https://doi.org/10.1130/2020.2548(06).
S2E. Kalaloch K4
Taxa	H	P	LE	RE	Other	MNI
Carabidae
Trechus chalybeus		1				1
Trechus sp.				3		3
Trechini gen. sp. nov.
Hydrophilidae
Helophorus auricollis	2		2	2		2
Helophorus sp.		3	3	3	11f E	3
Cercyon sp.			1
Silphidae
Aclypea bituberosa			1	1		1
Staphylinidae
Arpedium cribratum	1	1				1
Arpedium sp.			1	7		7
Olophrum sp.			1			1
Tachyporinae				1		1
Aleocharinae		1	1			1
Stenus	1	1	1	1		1
Quedius sp.	1					1
Philonthus sp.		1				1
Staphylininae gen. sp.	1			1		1
Elateridae
Hypnoidus sp.			2	2		2
Chrysomelidae
Neocrepidodera robusta			4	2		4
Chrysomelidae gen. sp.			1	2		2
Brentidae
Apion spp.			1	2		2
Curculionidae
Erirhinus sp.				1	1E	1
Entiminae gen. sp.	1			1		1
Hymenoptera
Hymenoptera gen. sp.	4					4
Total Individuals						41
H=head(s); P=pronotum(a); LE= left elytron (a); RE=right elytron (a);S=sternite (s);
E=elytron indeterminate; f=fragment; MNI=minimum number of individuals
